# Supplementary material for: Artificial-Intelligence-Based Imaging Analysis of Stem Cells: A Systematic Scoping Review
Source: MDPI journal article supplement (doi:10.3390/biology11101412), 2022-09-28
Supplement: s1 [file s1]

Table S1. Searching stagey:

**Artificial intelligence-based imaging analysis of stem cells: a systematic scoping review**

Searched databases: PubMed, Medline, Web of Science, Cochrane (Wiley), and Scopus

Searching Date: 09/03/2022

No filters applied and no publication date restrictions.

1- PubMed:

| Search | Query                                                                                                                                                                                                                              | Field     | Records retrieved |
|--------|------------------------------------------------------------------------------------------------------------------------------------------------------------------------------------------------------------------------------------|-----------|-------------------|
| #1     | (algorithm) OR (algorithm*) OR ("artificial intelligence") OR (AI) OR (automatic) OR (automated) OR (semi-automatic) OR (semi-automated) OR ("deep learning") OR ("convolutional neural network") OR (CNN) OR ("machine learning") | All Field | 1,837,309         |
| #2     | ("stem cells") OR ("stem cell*")                                                                                                                                                                                                   | All Field | 448,711           |
| #3     | ("imaging")                                                                                                                                                                                                                        | All Field | 2,356,758         |
| #4     | #1 AND #2 AND #3                                                                                                                                                                                                                   |           | 1,377             |

2- Medline (Ovid):

| Search | Query                                                                                                                                                                                              | Field                                                                                                                                               | Records retrieved |
|--------|----------------------------------------------------------------------------------------------------------------------------------------------------------------------------------------------------|-----------------------------------------------------------------------------------------------------------------------------------------------------|-------------------|
| #1     | algorithm OR algorithm* OR artificial intelligence OR AI OR automatic OR automated OR semi-automatic OR semi-automated OR deep learning OR convolutional neural network OR CNN OR machine learning | mp.<br>[mp=title,<br>abstract,<br>original<br>title,<br>name of<br>substance<br>word,<br>subject<br>heading<br>word,<br>floating<br>sub-<br>heading | 728,039           |

|    |                          |                                                                                                                                                                                                                                                   |         |
|----|--------------------------|---------------------------------------------------------------------------------------------------------------------------------------------------------------------------------------------------------------------------------------------------|---------|
|    |                          | word,<br>keyword<br>heading<br>word,<br>organism<br>suppleme<br>ntary<br>concept<br>word,<br>protocol<br>suppleme<br>ntary<br>concept<br>word, rare<br>disease<br>suppleme<br>ntary<br>concept<br>word,<br>unique<br>identifier,<br>synonyms<br>] |         |
| #2 | stem cells OR stem cell* | mp.<br>[mp=title,<br>abstract,<br>original<br>title,<br>name of<br>substance<br>word,<br>subject<br>heading<br>word,<br>floating<br>sub-<br>heading<br>word,<br>keyword<br>heading<br>word,<br>organism<br>suppleme<br>ntary                      | 407,309 |

|    |         |                                                                                                                                                                                                                        |           |
|----|---------|------------------------------------------------------------------------------------------------------------------------------------------------------------------------------------------------------------------------|-----------|
|    |         | concept word, protocol supplementary concept word, rare disease supplementary concept word, unique identifier, synonyms ]                                                                                              |           |
| #3 | imaging | mp. [mp=title, abstract, original title, name of substance word, subject heading word, floating sub-heading word, keyword heading word, organism supplementary concept word, protocol supplementary concept word, rare | 2,265,597 |

|    |                  |                                                                                            |     |
|----|------------------|--------------------------------------------------------------------------------------------|-----|
|    |                  | disease<br>suppleme<br>ntary<br>concept<br>word,<br>unique<br>identifier,<br>synonyms<br>] |     |
| #3 | #1 AND #2 AND #3 |                                                                                            | 479 |

Cochrane (Wiley):

| Search | Query                                                                                                                                                                                                    | Field                           | Records<br>retrieved |
|--------|----------------------------------------------------------------------------------------------------------------------------------------------------------------------------------------------------------|---------------------------------|----------------------|
| #1     | algorithm OR algorithm* OR “artificial intelligence” OR AI OR automatic OR automated OR semi-automatic OR semi-automated OR deep learning OR “Convolutional neural network” OR CNN OR “machine learning” | Title/Abst<br>ract/Key<br>words | 39,068               |
| #2     | “stem cells” OR “stem cell*”                                                                                                                                                                             | Title/Abst<br>ract/Key<br>words | 146,58               |
| #3     | “imaging”                                                                                                                                                                                                | Title/Abst<br>ract/Key<br>words | 802,77               |
| #4     | #1 AND #2 AND #3                                                                                                                                                                                         |                                 | 29                   |

Web of Science:

| Search | Query                                                                                                                                                                                                             | Field                                                                             | Records<br>retrieved |
|--------|-------------------------------------------------------------------------------------------------------------------------------------------------------------------------------------------------------------------|-----------------------------------------------------------------------------------|----------------------|
| #1     | ALL=(algorithm OR algorithm* OR “artificial intelligence” OR AI OR automatic OR automated OR semi-automatic OR semi-automated OR “deep learning” OR “Convolutional neural network” OR CNN OR “machine learning” ) | Index<br>es=SCI<br>-<br>EXPA<br>NDED,<br>SSCI,<br>A&HCI<br>, CPCI-<br>S,<br>CPCI- | 3,896,415            |

|    |                                    |                                                                                                              |           |
|----|------------------------------------|--------------------------------------------------------------------------------------------------------------|-----------|
|    |                                    | SSH,<br>BKCI-S,<br>BKCI-SSH,<br>ESCI,<br>CCR-EXPANDED,<br>IC Timespan=All                                    |           |
| #2 | ALL=("stem cells" OR "stem cell*") | Indexes=SCI - EXPANDED, SSCI, A&HCI, CPCI-S, CPCI-SSH, BKCI-S, BKCI-SSH, ESCI, CCR-EXPANDED, IC Timespan=All | 567,490   |
| #3 | ALL=(imaging)                      | Indexes=SCI - EXPANDED, SSCI, A&HCI, CPCI-                                                                   | 3,216,001 |

|    |                  |                                                                                                                     |       |
|----|------------------|---------------------------------------------------------------------------------------------------------------------|-------|
|    |                  | S,<br>CPCI-<br>SSH,<br>BKCI-<br>S,<br>BKCI-<br>SSH,<br>ESCI,<br>CCR-<br>EXPA<br>NDED,<br>IC<br>Times<br>pan=A<br>ll |       |
| #4 | #1 AND #2 AND #3 |                                                                                                                     | 1,618 |

Scopus:

| Search | Query                                                                                                                                                                                                                        | Field                                      | Records<br>retrieved |
|--------|------------------------------------------------------------------------------------------------------------------------------------------------------------------------------------------------------------------------------|--------------------------------------------|----------------------|
| #1     | TITLE-ABS-KEY ( algorithm OR algorithm* OR "artificial intelligence" OR ai OR automatic OR automated OR semi-automatic OR semi-automated OR "deep learning" OR "Convolutional neural network" OR cnn OR “machine learning” ) | Article<br>title,<br>Abstract,<br>Keywords | 4,859,094            |
| #2     | TITLE-ABS-KEY ( "stem cells" OR "stem cell*" )                                                                                                                                                                               | Article<br>title,<br>Abstract,<br>Keywords | 531,876              |
| #3     | TITLE-ABS-KEY ( imaging )                                                                                                                                                                                                    | Article<br>title,<br>Abstract,<br>Keywords | 2,623,179            |
| #3     | #1 AND #2 AND #4                                                                                                                                                                                                             |                                            | 919                  |
